# Supplementary material
Source: publisher figshare collection journal article supplement (https://frontiersin.figshare.com/ndownloader/files/21932721)
Supplement: Supplementary file 1 [file 21932721]

Archive with 60 entries (60 files):
- Data S2 - Heavily logged - Canopy height.gri
- Data S2 - Moderately logged - Elevation.grd
- Data S2 - Heavily logged - Basal area density.grd
- Data S2 - Moderately logged - cos(Aspect).grd
- Data S2 - Moderately logged - Mean temperature.grd
- Data S2 - Old growth - Basal area density.gri
- Data S2 - Moderately logged - Leaf area index.gri
- Data S2 - Moderately logged - Basal area density.grd
- Data S2 - Old growth - Mean temperature.grd
- Data S2 - Old growth - Elevation.grd
- Data S2 - Old growth - cos(Aspect).gri
- Data S2 - Old growth - Canopy height.gri
- Data S2 - Heavily logged - Slope.gri
- Data S2 - Moderately logged - Canopy height.grd
- Data S2 - Heavily logged - Mean temperature.gri
- Data S2 - Heavily logged - Maximum temperature.grd
- Data S2 - Old growth - Maximum temperature.grd
- Data S2 - Old growth - Minimum temperature.gri
- Data S2 - Old growth - Canopy density.grd
- Data S2 - Heavily logged - Minimum temperature.gri
- Data S2 - Moderately logged - Slope.gri
- Data S2 - Old growth - Slope.grd
- Data S2 - Heavily logged - Leaf area index.grd
- Data S2 - Moderately logged - Maximum temperature.gri
- Data S2 - Moderately logged - Canopy density.grd
- Data S2 - Old growth - Leaf area index.grd
- Data S2 - Heavily logged - Canopy density.gri
- Data S2 - Moderately logged - Minimum temperature.grd
- Data S2 - Heavily logged - Elevation.gri
- Data S2 - Heavily logged - cos(Aspect).grd
- Data S2 - Heavily logged - Canopy height.grd
- Data S2 - Moderately logged - Elevation.gri
- Data S2 - Moderately logged - cos(Aspect).gri
- Data S2 - Heavily logged - Basal area density.gri
- Data S2 - Moderately logged - Leaf area index.grd
- Data S2 - Old growth - Basal area density.grd
- Data S2 - Moderately logged - Mean temperature.gri
- Data S2 - Old growth - cos(Aspect).grd
- Data S2 - Old growth - Elevation.gri
- Data S2 - Old growth - Mean temperature.gri
- Data S2 - Moderately logged - Basal area density.gri
- Data S2 - Heavily logged - Mean temperature.grd
- Data S2 - Moderately logged - Canopy height.gri
- Data S2 - Heavily logged - Slope.grd
- Data S2 - Old growth - Canopy height.grd
- Data S2 - Heavily logged - Leaf area index.gri
- Data S2 - Old growth - Slope.gri
- Data S2 - Heavily logged - Minimum temperature.grd
- Data S2 - Moderately logged - Slope.grd
- Data S2 - Old growth - Canopy density.gri
- Data S2 - Old growth - Minimum temperature.grd
- Data S2 - Old growth - Maximum temperature.gri
- Data S2 - Heavily logged - Maximum temperature.gri
- Data S2 - Moderately logged - Minimum temperature.gri
- Data S2 - Heavily logged - Canopy density.grd
- Data S2 - Old growth - Leaf area index.gri
- Data S2 - Moderately logged - Canopy density.gri
- Data S2 - Moderately logged - Maximum temperature.grd
- Data S2 - Heavily logged - cos(Aspect).gri
- Data S2 - Heavily logged - Elevation.grd
