# Supplementary material
Source: publisher figshare collection journal article supplement (https://frontiersin.figshare.com/ndownloader/files/21932721)
Supplement: Supplementary file 1 [file 21932721 › Data S2 - Heavily logged - Basal area density.grd]

[general]
creator=R package 'raster'
created=2018-02-21 16:42:52
[georeference]
nrows=150
ncols=150
xmin=568514
ymin=522978
xmax=568664
ymax=523128
projection=+proj=utm +zone=50 +datum=WGS84 +units=m +no_defs +ellps=WGS84 +towgs84=0,0,0
[data]
datatype=FLT4S
byteorder=little
nbands=1
bandorder=BIL
categorical=FALSE
minvalue=0
maxvalue=0.0156266881278466
nodatavalue=-3.4e+38
[legend]
legendtype=
values=
color=
[description]
layername=basal_area
