# Supplementary material
Source: publisher figshare collection journal article supplement (https://frontiersin.figshare.com/ndownloader/files/21932721)
Supplement: Supplementary file 1 [file 21932721 › Data S2 - Old growth - Mean temperature.grd]

[general]
creator=R package 'raster'
created=2018-02-21 16:42:53
[georeference]
nrows=150
ncols=150
xmin=496597
ymin=524664
xmax=496747
ymax=524814
projection=+proj=utm +zone=50 +datum=WGS84 +units=m +no_defs +ellps=WGS84 +towgs84=0,0,0
[data]
datatype=FLT4S
byteorder=little
nbands=1
bandorder=BIL
categorical=FALSE
minvalue=23.2820730814854
maxvalue=24.2624866477056
nodatavalue=-3.4e+38
[legend]
legendtype=
values=
color=
[description]
layername=response_mean
